# Supplementary material for: Patterns of Feeding by Householders Affect Activity of Hedgehogs (Erinaceus europaeus) during the Hibernation Period
Source: PubMed Central journal article supplement (PMC7460126; doi:10.3390/ani10081344), 2020-08-04
Supplement: animals-10-01344-s001.pdf [file animals-10-01344-s001.pdf]

**Table S1.** Full occupancy models for winter season based upon alternative cut-off threshold of < 20% of gardens occupied per week. Under this scenario, the winter season would have been defined as Weeks 6-16 (23/12/2017–09/03/2018) rather than Weeks 8-16 (06/01/2018–09/03/2018) as presented in the manuscript. Detection probability was modelled as constant. The variance inflation factor  $\hat{c}$  was adjusted based on goodness-of-fit tests of one of the most parameterised models (2.5817). The three top models in this extended timeframe (11 weeks) are the same as those presented in the manuscript (9 weeks).

| Model                                  | QAIC   | $\Delta$ QAIC | AIC weight | Model likelihood | K | -2*LogLike | Covariates        | Estimate | SE    | Inflated SE | Lower limit | Upper limit |
|----------------------------------------|--------|---------------|------------|------------------|---|------------|-------------------|----------|-------|-------------|-------------|-------------|
| psi(FEDBEFORE),p(FEEDHOG + GRASSTEMP)  | 136.82 | 0.00          | 0.3436     | 1.0000           | 5 | 327.41     | psi(FEDBEFORE)    | 2.408    | 0.730 | 1.173       | 0.109       | 4.707       |
|                                        |        |               |            |                  |   |            | p(FEEDHOG)        | 1.089    | 0.275 | 0.442       | 0.223       | 1.955       |
|                                        |        |               |            |                  |   |            | p(GRASSTEMP)      | 0.501    | 0.177 | 0.285       | -0.057      | 1.060       |
| psi(FEDBEFORE),p(FEEDHOG + AIRTEMP)    | 137.08 | 0.26          | 0.3017     | 0.8781           | 5 | 328.09     | psi(FEDBEFORE)    | 2.408    | 0.730 | 1.173       | 0.108       | 4.708       |
|                                        |        |               |            |                  |   |            | p(FEEDHOG)        | 1.087    | 0.275 | 0.441       | 0.222       | 1.952       |
|                                        |        |               |            |                  |   |            | p(AIRTEMP)        | 0.489    | 0.181 | 0.291       | -0.081      | 1.059       |
| psi(FEDBEFORE),p(FEEDHOG + FEEDOTHERS) | 138.76 | 1.94          | 0.1303     | 0.3791           | 5 | 332.41     | psi(FEDBEFORE)    | 2.628    | 0.834 | 1.340       | 0.002       | 5.255       |
|                                        |        |               |            |                  |   |            | p(FEEDHOG)        | 0.919    | 0.279 | 0.448       | 0.042       | 1.796       |
|                                        |        |               |            |                  |   |            | p(FEEDOTHERS)     | 1.398    | 0.670 | 1.077       | -0.712      | 3.508       |
| psi(.),p(FEDBEFORE)                    | 140.14 | 3.32          | 0.0653     | 0.1901           | 3 | 346.32     | p(FEDBEFORE)      | 2.373    | 0.445 | 0.715       | 0.972       | 3.773       |
| psi(.),p(FEEDHOG)                      | 141.12 | 4.30          | 0.0400     | 0.1165           | 3 | 348.85     | p(FEEDHOG)        | 1.293    | 0.290 | 0.465       | 0.380       | 2.205       |
| psi(FEDBEFORE),p(.)                    | 142.34 | 5.52          | 0.0217     | 0.0633           | 3 | 352.00     | psi(FEDBEFORE)    | 2.300    | 0.629 | 1.010       | 0.320       | 4.281       |
| psi(FEEDHOG),p(.)                      | 143.95 | 7.13          | 0.0097     | 0.0283           | 3 | 356.15     | psi(FEEDHOG)      | 1.187    | 0.385 | 0.619       | -0.026      | 2.400       |
| psi(.),p(GARDENSIZE)                   | 144.11 | 7.29          | 0.0090     | 0.0261           | 3 | 356.56     | p(GARDENSIZE)     | -1.007   | 0.363 | 0.584       | -2.151      | 0.137       |
| psi(.),p(FEEDOTHERS)                   | 144.71 | 7.89          | 0.0066     | 0.0194           | 3 | 358.10     | p(FEEDOTHERS)     | 1.906    | 0.638 | 1.026       | -0.104      | 3.917       |
| psi(NEAREST+VE),p(.)                   | 144.90 | 8.08          | 0.0060     | 0.0176           | 3 | 358.60     | psi(NEAREST+VE)   | -1.171   | 0.499 | 0.802       | -2.742      | 0.400       |
| psi(.),p(GRASSTEMP)                    | 145.00 | 8.18          | 0.0058     | 0.0167           | 3 | 358.86     | p(GRASSTEMP)      | 0.487    | 0.175 | 0.281       | -0.063      | 1.038       |
| psi(.),p(AIRTEMP)                      | 145.26 | 8.44          | 0.0051     | 0.0147           | 3 | 359.52     | p(AIRTEMP)        | 0.476    | 0.179 | 0.287       | -0.087      | 1.038       |
| 1 group, Constant P                    | 146.43 | 9.61          | 0.0028     | 0.0082           | 2 | 367.70     |                   |          |       |             |             |             |
| psi(.),p(RAINFALL)                     | 146.60 | 9.78          | 0.0026     | 0.0075           | 3 | 362.98     | p(RAINFALL)       | 0.322    | 0.149 | 0.239       | -0.146      | 0.791       |
| psi(.),p(ARABLE500m)                   | 146.73 | 9.91          | 0.0024     | 0.0070           | 3 | 363.32     | p(ARABLE500m)     | 0.249    | 0.117 | 0.188       | -0.119      | 0.618       |
| psi(.),p(GOODHABITAT)                  | 146.91 | 10.09         | 0.0022     | 0.0064           | 3 | 363.78     | p(GOODHABITAT)    | -1.741   | 0.865 | 1.389       | -4.464      | 0.982       |
| psi(GARDENSIZE),p(.)                   | 147.08 | 10.26         | 0.0020     | 0.0059           | 3 | 364.22     | psi(GARDENSIZE)   | -0.703   | 0.457 | 0.734       | -2.141      | 0.736       |
| psi(.),p(URBAN500m)                    | 147.11 | 10.29         | 0.0020     | 0.0058           | 3 | 364.30     | p(URBAN500m)      | -0.318   | 0.170 | 0.274       | -0.855      | 0.218       |
| psi(WOODDIST),p(.)                     | 147.14 | 10.32         | 0.0020     | 0.0057           | 3 | 364.38     | psi(WOODDIST)     | -0.543   | 0.319 | 0.513       | -1.548      | 0.463       |
| psi(CONNECTIVITY),p(.)                 | 147.32 | 10.50         | 0.0018     | 0.0052           | 3 | 364.84     | psi(CONNECTIVITY) | 1.684    | 1.034 | 1.661       | -1.572      | 4.939       |

|                        |        |       |        |        |   |        |                   |        |       |       |        |       |
|------------------------|--------|-------|--------|--------|---|--------|-------------------|--------|-------|-------|--------|-------|
| psi(GRASS250m),p(.)    | 147.45 | 10.63 | 0.0017 | 0.0049 | 3 | 365.17 | psi(GRASS250m)    | -0.520 | 0.375 | 0.603 | -1.701 | 0.661 |
| psi(WOOD500m),p(.)     | 147.45 | 10.63 | 0.0017 | 0.0049 | 3 | 365.19 | psi(WOOD500m)     | 0.434  | 0.280 | 0.451 | -0.449 | 1.317 |
| psi(FEEDOTHERS),p(.)   | 147.62 | 10.80 | 0.0016 | 0.0045 | 3 | 365.63 | psi(FEEDOTHERS)   | 0.976  | 0.717 | 1.152 | -1.281 | 3.233 |
| psi(.),p(GRASS250m)    | 147.66 | 10.84 | 0.0015 | 0.0044 | 3 | 365.73 | p(GRASS250m)      | 0.412  | 0.277 | 0.445 | -0.461 | 1.286 |
| psi(.),p(HOUSETYPE)    | 147.67 | 10.85 | 0.0015 | 0.0044 | 3 | 365.74 | p(HOUSETYPE)      | 0.604  | 0.455 | 0.731 | -0.829 | 2.037 |
| psi(.),p(ARABLEDIST)   | 147.72 | 10.90 | 0.0015 | 0.0043 | 3 | 365.87 | p(ARABLEDIST)     | -0.222 | 0.168 | 0.271 | -0.752 | 0.308 |
| psi(.),p(GRASS500m)    | 147.73 | 10.91 | 0.0015 | 0.0043 | 3 | 365.91 | p(GRASS500m)      | 0.291  | 0.210 | 0.337 | -0.370 | 0.951 |
| psi(.),p(NEARESTOTHER) | 147.82 | 11.00 | 0.0014 | 0.0041 | 3 | 366.13 | psi(NEARESTOTHER) | 0.144  | 0.114 | 0.183 | -0.213 | 0.502 |
| psi(GRASS500m),p(.)    | 147.91 | 11.09 | 0.0013 | 0.0039 | 3 | 366.38 | psi(GRASS500m)    | -0.339 | 0.314 | 0.505 | -1.329 | 0.650 |
| psi(GOODHABITAT),p(.)  | 147.94 | 11.12 | 0.0013 | 0.0038 | 3 | 366.44 | psi(GOODHABITAT)  | 1.849  | 1.732 | 2.783 | -3.607 | 7.304 |
| psi(.),p(DAYTIME)      | 147.94 | 11.12 | 0.0013 | 0.0038 | 3 | 366.45 | p(DAYTIME)        | -0.169 | 0.152 | 0.244 | -0.648 | 0.310 |
| psi(.),p(CONNECTIVITY) | 148.06 | 11.24 | 0.0012 | 0.0036 | 3 | 366.76 | p(CONNECTIVITY)   | 0.565  | 0.602 | 0.967 | -1.331 | 2.461 |
| psi(URBAN250m),p(.)    | 148.13 | 11.31 | 0.0012 | 0.0035 | 3 | 366.93 | psi(URBAN250m)    | 0.247  | 0.292 | 0.469 | -0.672 | 1.167 |
| psi(.),p(NESTSITES)    | 148.13 | 11.31 | 0.0012 | 0.0035 | 3 | 366.94 | p(NESTSITES)      | 0.126  | 0.145 | 0.234 | -0.332 | 0.584 |
| psi(FRONT2BACK),p(.)   | 148.19 | 11.37 | 0.0012 | 0.0034 | 3 | 367.08 | psi(FRONT2BACK)   | -0.424 | 0.543 | 0.873 | -2.135 | 1.288 |
| psi(ARABLE500m),p(.)   | 148.22 | 11.40 | 0.0011 | 0.0033 | 3 | 367.18 | psi(ARABLE500m)   | 0.189  | 0.263 | 0.423 | -0.640 | 1.018 |
| psi(.),p(NEAREST+VE)   | 148.31 | 11.49 | 0.0011 | 0.0032 | 3 | 367.40 | p(NEAREST+VE)     | -0.462 | 0.434 | 0.698 | -1.830 | 0.906 |
| psi(WOOD250m),p(.)     | 148.32 | 11.50 | 0.0011 | 0.0032 | 3 | 367.43 | psi(WOOD250m)     | 0.137  | 0.266 | 0.428 | -0.702 | 0.975 |
| psi(NESTSITES),p(.)    | 148.34 | 11.52 | 0.0011 | 0.0032 | 3 | 367.48 | psi(NESTSITES)    | 0.125  | 0.271 | 0.435 | -0.727 | 0.978 |
| psi(.),p(GRASSDIST)    | 148.35 | 11.53 | 0.0011 | 0.0031 | 3 | 367.51 | p(GRASSDIST)      | 0.066  | 0.153 | 0.247 | -0.417 | 0.549 |
| psi(URBAN500m),p(.)    | 148.36 | 11.54 | 0.0011 | 0.0031 | 3 | 367.52 | psi(URBAN500m)    | 0.116  | 0.279 | 0.448 | -0.761 | 0.994 |
| psi(.),p(WOODDIST)     | 148.37 | 11.55 | 0.0011 | 0.0031 | 3 | 367.56 | p(WOODDIST)       | -0.081 | 0.216 | 0.347 | -0.762 | 0.599 |
| psi(.),p(URBAN250m)    | 148.37 | 11.55 | 0.0011 | 0.0031 | 3 | 367.55 | p(URBAN250m)      | -0.069 | 0.187 | 0.300 | -0.657 | 0.520 |
| psi(GRASSDIST),p(.)    | 148.38 | 11.56 | 0.0011 | 0.0031 | 3 | 367.59 | psi(GRASSDIST)    | 0.092  | 0.270 | 0.434 | -0.760 | 0.943 |
| psi(.),p(FRONT2BACK)   | 148.38 | 11.56 | 0.0011 | 0.0031 | 3 | 367.58 | p(FRONT2BACK)     | -0.100 | 0.313 | 0.503 | -1.085 | 0.885 |
| psi(.),p(WOOD250m)     | 148.40 | 11.58 | 0.0011 | 0.0031 | 3 | 367.63 | p(WOOD250m)       | -0.042 | 0.167 | 0.269 | -0.569 | 0.486 |
| psi(NEARESTOTHER),p(.) | 148.41 | 11.59 | 0.0010 | 0.0030 | 3 | 367.67 | psi(NEARESTOTHER) | 0.042  | 0.267 | 0.429 | -0.799 | 0.882 |
| psi(ARABLEDIST),p(.)   | 148.41 | 11.59 | 0.0010 | 0.0030 | 3 | 367.65 | psi(ARABLEDIST)   | -0.057 | 0.273 | 0.439 | -0.917 | 0.802 |
| psi(.),p(WOOD500m)     | 148.42 | 11.60 | 0.0010 | 0.0030 | 3 | 367.68 | p(WOOD500m)       | -0.020 | 0.165 | 0.266 | -0.541 | 0.501 |
| psi(HOUSETYPE),p(.)    | 148.42 | 11.60 | 0.0010 | 0.0030 | 3 | 367.68 | psi(HOUSETYPE)    | 0.088  | 0.690 | 1.108 | -2.084 | 2.261 |

**Table S2.** Full occupancy model results for autumn (Weeks 1-7: 18/11/17-05/01/2018). Detection probability was modelled as survey-specific [p(survey)].

| Model                                           | QAIC   | ΔQAIC | AIC weight | Model likelihood | K  | -2*LogLike | Covariates        | Estimate | SE    | Inflated SE | Lower limit | Upper limit |
|-------------------------------------------------|--------|-------|------------|------------------|----|------------|-------------------|----------|-------|-------------|-------------|-------------|
| psi(FEDBEFORE + WOOD500m),p(survey + NESTSITES) | 283.85 | 0.00  | 0.8966     | 1.0000           | 11 | 296.13     | psi(FEDBEFORE)    | 2.771    | 0.792 | 0.843       | 1.119       | 4.423       |
|                                                 |        |       |            |                  |    |            | psi(WOOD500m)     | 1.308    | 0.432 | 0.459       | 0.407       | 2.208       |
|                                                 |        |       |            |                  |    |            | p(NESTSITES)      | 0.456    | 0.161 | 0.171       | 0.122       | 0.791       |
| psi(FEDBEFORE + WOOD500m),p(survey)             | 289.43 | 5.58  | 0.0551     | 0.0614           | 10 | 304.70     | psi(FEDBEFORE)    | 2.730    | 0.769 | 0.818       | 1.127       | 4.334       |
|                                                 |        |       |            |                  |    |            | psi(WOOD500m)     | 1.290    | 0.421 | 0.447       | 0.413       | 2.167       |
| psi(WOOD500m),p(survey + FEEDHOG)               | 290.47 | 6.62  | 0.0327     | 0.0365           | 10 | 305.87     | psi(WOOD500m)     | 1.088    | 0.365 | 0.388       | 0.328       | 1.848       |
|                                                 |        |       |            |                  |    |            | p(FEEDHOG)        | 0.872    | 0.236 | 0.251       | 0.380       | 1.364       |
| psi(NEAREST+VE),p(survey)                       | 292.12 | 8.27  | 0.0143     | 0.0160           | 9  | 310.00     | psi(NEAREST+VE)   | -2.288   | 0.693 | 0.737       | -3.732      | -0.843      |
| psi(FEDBEFORE),p(survey)                        | 299.15 | 15.30 | 0.0004     | 0.0005           | 9  | 317.95     | psi(FEDBEFORE)    | 2.316    | 0.646 | 0.687       | 0.969       | 3.664       |
| psi(.),p(survey + FEEDHOG)                      | 299.44 | 15.59 | 0.0004     | 0.0004           | 9  | 318.28     | p(FEEDHOG)        | 0.873    | 0.239 | 0.254       | 0.374       | 1.372       |
| psi(FEEDHOG),p(survey)                          | 301.97 | 18.12 | 0.0001     | 0.0001           | 9  | 321.14     | psi(FEEDHOG)      | 1.153    | 0.347 | 0.369       | 0.430       | 1.876       |
| psi(WOOD500m),p(survey)                         | 302.48 | 18.63 | 0.0001     | 0.0001           | 9  | 321.72     | psi(WOOD500m)     | 1.038    | 0.336 | 0.358       | 0.338       | 1.739       |
| psi(.),p(survey + NEARESTOTHER)                 | 303.15 | 19.30 | 0.0001     | 0.0001           | 9  | 322.48     | p(NEARESTOTHER)   | 0.633    | 0.218 | 0.232       | 0.179       | 1.088       |
| psi(.),p(survey + FEDBEFORE)                    | 303.45 | 19.60 | 0.0000     | 0.0001           | 9  | 322.81     | p(FEDBEFORE)      | 1.118    | 0.345 | 0.367       | 0.399       | 1.836       |
| psi(.),p(survey + GRASS250m)                    | 303.93 | 20.08 | 0.0000     | 0.0000           | 9  | 323.36     | p(GRASS250m)      | 1.325    | 0.447 | 0.476       | 0.393       | 2.257       |
| psi(WOODDIST),p(survey)                         | 305.61 | 21.76 | 0.0000     | 0.0000           | 9  | 325.26     | psi(WOODDIST)     | -0.850   | 0.322 | 0.342       | -1.521      | -0.179      |
| psi(.),p(survey + NESTSITES)                    | 305.89 | 22.04 | 0.0000     | 0.0000           | 9  | 325.57     | p(NESTSITES)      | 0.456    | 0.161 | 0.172       | 0.120       | 0.792       |
| psi(.),p(survey + CONNECTIVITY)                 | 308.45 | 24.60 | 0.0000     | 0.0000           | 9  | 328.47     | p(CONNECTIVITY)   | 1.277    | 0.547 | 0.582       | 0.136       | 2.417       |
| psi(.),p(survey + GRASS500M)                    | 308.51 | 24.66 | 0.0000     | 0.0000           | 9  | 328.54     | p(GRASS500M)      | 0.526    | 0.231 | 0.246       | 0.044       | 1.007       |
| psi(.),p(survey + URBAN500m)                    | 308.69 | 24.84 | 0.0000     | 0.0000           | 9  | 328.74     | p(URBAN500m)      | -0.449   | 0.200 | 0.213       | -0.866      | -0.032      |
| psi(GRASS250m),p(survey)                        | 308.85 | 25.00 | 0.0000     | 0.0000           | 9  | 328.92     | psi(GRASS250m)    | -0.656   | 0.330 | 0.351       | -1.344      | 0.033       |
| psi(.),p(survey + NEAREST+VE)                   | 309.12 | 25.27 | 0.0000     | 0.0000           | 9  | 329.23     | p(NEAREST+VE)     | 0.987    | 0.475 | 0.505       | -0.003      | 1.977       |
| psi(CONNECTIVITY),p(survey)                     | 309.18 | 25.33 | 0.0000     | 0.0000           | 9  | 329.30     | psi(CONNECTIVITY) | 2.023    | 0.958 | 1.019       | 0.025       | 4.020       |
| psi(.),p(survey + FRONT2BACK)                   | 310.09 | 26.24 | 0.0000     | 0.0000           | 9  | 330.32     | p(FRONT2BACK)     | 0.614    | 0.320 | 0.340       | -0.053      | 1.281       |
| psi(NEARESTOTHER),p(survey)                     | 310.11 | 26.26 | 0.0000     | 0.0000           | 9  | 330.35     | psi(NEARESTOTHER) | -0.534   | 0.299 | 0.318       | -1.156      | 0.089       |
| psi(.),p(survey + URBAN250m)                    | 310.29 | 26.44 | 0.0000     | 0.0000           | 9  | 330.55     | p(URBAN250m)      | -0.349   | 0.191 | 0.203       | -0.747      | 0.049       |
| psi(WOOD250m),p(survey)                         | 310.42 | 26.57 | 0.0000     | 0.0000           | 9  | 330.70     | psi(WOOD250m)     | 0.549    | 0.343 | 0.365       | -0.166      | 1.263       |
| psi(GARDENAREA),p(survey)                       | 310.62 | 26.77 | 0.0000     | 0.0000           | 9  | 330.92     | psi(GARDENAREA)   | -0.520   | 0.332 | 0.353       | -1.213      | 0.172       |
| psi(.),p(survey + GOODHABITAT)                  | 311.02 | 27.17 | 0.0000     | 0.0000           | 9  | 331.38     | p(GOODHABITAT)    | 1.311    | 0.802 | 0.853       | -0.361      | 2.983       |

|                               |        |       |        |        |   |        |                  |        |        |        |          |         |
|-------------------------------|--------|-------|--------|--------|---|--------|------------------|--------|--------|--------|----------|---------|
| 1 group, Survey-specific P.   | 311.41 | 27.56 | 0.0000 | 0.0000 | 8 | 334.08 |                  |        |        |        |          |         |
| psi(.),p(survey + GRASSDIST)  | 311.62 | 27.77 | 0.0000 | 0.0000 | 9 | 332.05 | p(GRASSDIST)     | -0.239 | 0.168  | 0.179  | -0.590   | 0.112   |
| psi(.),p(survey + ARABLE500m) | 311.84 | 27.99 | 0.0000 | 0.0000 | 9 | 332.30 | p(ARABLE500m)    | 0.216  | 0.166  | 0.177  | -0.130   | 0.562   |
| psi(.),p(survey + ARABLEDIST) | 312.04 | 28.19 | 0.0000 | 0.0000 | 9 | 332.53 | p(ARABLEDIST)    | 0.211  | 0.171  | 0.182  | -0.146   | 0.567   |
| psi(GRASS500m),p(survey)      | 312.40 | 28.55 | 0.0000 | 0.0000 | 9 | 332.94 | psi(GRASS500m)   | -0.275 | 0.264  | 0.280  | -0.825   | 0.274   |
| psi(.),p(survey + WOODDIST)   | 312.41 | 28.56 | 0.0000 | 0.0000 | 9 | 332.95 | p(WOODDIST)      | -0.241 | 0.234  | 0.248  | -0.728   | 0.246   |
| psi(.),p(survey + HOUSETYPE)  | 312.69 | 28.84 | 0.0000 | 0.0000 | 9 | 333.27 | p(HOUSETYPE)     | 0.370  | 0.411  | 0.437  | -0.487   | 1.226   |
| psi(.),p(survey + GARDENAREA) | 312.72 | 28.87 | 0.0000 | 0.0000 | 9 | 333.30 | p(GARDENAREA)    | -0.196 | 0.233  | 0.248  | -0.681   | 0.290   |
| psi(.),p(survey + FEEDOTHERS) | 312.76 | 28.91 | 0.0000 | 0.0000 | 9 | 333.34 | p(FEEDOTHERS)    | 0.327  | 0.381  | 0.406  | -0.468   | 1.122   |
| psi(NESTSITES),p(survey)      | 312.93 | 29.08 | 0.0000 | 0.0000 | 9 | 333.54 | psi(NESTSITES)   | 0.188  | 0.258  | 0.275  | -0.350   | 0.726   |
| psi(FEEDOTHERS),p(survey)     | 313.03 | 29.18 | 0.0000 | 0.0000 | 9 | 333.65 | psi(FEEDOTHERS)  | 0.386  | 0.594  | 0.632  | -0.853   | 1.625   |
| psi(ARABLEDIST),p(survey)     | 313.10 | 29.25 | 0.0000 | 0.0000 | 9 | 333.73 | psi(ARABLEDIST)  | -0.150 | 0.256  | 0.272  | -0.684   | 0.384   |
| psi(URBAN250m),p(survey)      | 313.12 | 29.27 | 0.0000 | 0.0000 | 9 | 333.75 | psi(URBAN250m)   | 0.145  | 0.256  | 0.272  | -0.388   | 0.678   |
| psi(.),p(survey + WOOD250m)   | 313.14 | 29.29 | 0.0000 | 0.0000 | 9 | 333.77 | p(WOOD250m)      | 0.074  | 0.134  | 0.143  | -0.206   | 0.354   |
| psi(GRASSDIST),p(survey)      | 313.23 | 29.38 | 0.0000 | 0.0000 | 9 | 333.87 | psi(GRASSDIST)   | 0.116  | 0.257  | 0.273  | -0.420   | 0.651   |
| psi(.),p(survey + WOOD500m)   | 313.23 | 29.38 | 0.0000 | 0.0000 | 9 | 333.88 | p(WOOD500m)      | 0.071  | 0.158  | 0.168  | -0.259   | 0.401   |
| psi(HOUSETYPE),p(survey)      | 313.32 | 29.47 | 0.0000 | 0.0000 | 9 | 333.98 | psi(HOUSETYPE)   | 0.197  | 0.643  | 0.684  | -1.143   | 1.537   |
| psi(GOODHABITAT),p(survey)    | 313.37 | 29.52 | 0.0000 | 0.0000 | 9 | 334.03 | psi(GOODHABITAT) | -0.301 | 1.444  | 1.535  | -3.310   | 2.708   |
| psi(FRONT2BACK),p(survey)     | 313.40 | 29.55 | 0.0000 | 0.0000 | 9 | 334.07 | psi(FRONT2BACK)  | -0.048 | 0.507  | 0.539  | -1.105   | 1.008   |
| psi(.),p(survey + RAINFALL)   | 313.41 | 29.56 | 0.0000 | 0.0000 | 9 | 334.08 | p(RAINFALL)      | -0.627 | 22.009 | 23.405 | -46.501  | 45.247  |
| psi(.),p(survey + AIRTEMP)    | 313.41 | 29.56 | 0.0000 | 0.0000 | 9 | 334.08 | p(AIRTEMP)       | 0.143  | 4.183  | 4.449  | -8.577   | 8.863   |
| psi(.),p(survey + DAYTIME)    | 313.41 | 29.56 | 0.0000 | 0.0000 | 9 | 334.08 | p(DAYTIME)       | 0.578  | 69.709 | 74.132 | -144.720 | 145.876 |
| psi(.),p(survey + GRASSTEMP)  | 313.41 | 29.56 | 0.0000 | 0.0000 | 9 | 334.08 | p(GRASSTEMP)     | -0.111 | 30.739 | 32.689 | -64.182  | 63.960  |
| psi(URBAN500m),p(survey)      | 313.41 | 29.56 | 0.0000 | 0.0000 | 9 | 334.08 | psi(URBAN500m)   | -0.010 | 0.255  | 0.272  | -0.542   | 0.523   |
| psi(ARABLE500m),p(survey)     | 343.05 | 59.20 | 0.0000 | 0.0000 | 3 | 381.17 | psi(ARABLE500m)  | 0.075  | 0.259  | 0.275  | -0.464   | 0.614   |

**Table S3.** Full occupancy model results for winter (Weeks 8-16: 06/01/2018-09/03/2018). Detection probability was modelled as constant.

| Model                                  | QAIC   | ΔQAIC | AIC weight | Model likelihood | K | -2*LogLike | Covariates      | Estimate | SE    | Inflated SE | Lower limit | Upper limit |
|----------------------------------------|--------|-------|------------|------------------|---|------------|-----------------|----------|-------|-------------|-------------|-------------|
| psi(FEDBEFORE),p(FEEDHOG + FEEDOTHERS) | 214.42 | 0.00  | 0.4561     | 1.0000           | 5 | 235.72     | psi(FEDBEFORE)  | 3.674    | 1.099 | 1.180       | 1.362       | 5.986       |
|                                        |        |       |            |                  |   |            | p(FEEDHOG)      | 1.168    | 0.359 | 0.385       | 0.413       | 1.924       |
|                                        |        |       |            |                  |   |            | p(FEEDOTHERS)   | 1.913    | 0.794 | 0.853       | 0.241       | 3.586       |
| psi(FEDBEFORE),p(FEEDHOG + GRASSTEMP)  | 215.41 | 0.99  | 0.2780     | 0.6096           | 5 | 236.86     | psi(FEDBEFORE)  | 3.196    | 0.901 | 0.968       | 1.299       | 5.093       |
|                                        |        |       |            |                  |   |            | p(FEEDHOG)      | 1.277    | 0.368 | 0.395       | 0.503       | 2.052       |
|                                        |        |       |            |                  |   |            | p(GRASSTEMP)    | 0.440    | 0.201 | 0.216       | 0.018       | 0.863       |
| psi(FEDBEFORE),p(FEEDHOG + AIRTEMP)    | 215.51 | 1.09  | 0.2645     | 0.5798           | 5 | 236.97     | psi(FEDBEFORE)  | 3.196    | 0.901 | 0.968       | 1.299       | 5.093       |
|                                        |        |       |            |                  |   |            | p(FEEDHOG)      | 1.277    | 0.368 | 0.395       | 0.502       | 2.051       |
|                                        |        |       |            |                  |   |            | p(AIRTEMP)      | 0.444    | 0.207 | 0.222       | 0.009       | 0.878       |
| psi(FEDBEFORE),p(.)                    | 226.65 | 12.23 | 0.0010     | 0.0022           | 3 | 254.43     | psi(FEDBEFORE)  | 3.157    | 0.772 | 0.829       | 1.533       | 4.781       |
| psi(.),p(FEEDHOG)                      | 229.40 | 14.98 | 0.0003     | 0.0006           | 3 | 257.60     | p(FEEDHOG)      | 1.714    | 0.372 | 0.400       | 0.931       | 2.497       |
| psi(FEEDHOG),p(.)                      | 232.95 | 18.53 | 0.0000     | 0.0001           | 3 | 261.70     | psi(FEEDHOG)    | 1.609    | 0.477 | 0.512       | 0.605       | 2.614       |
| psi(.),p(FEDBEFORE)                    | 233.80 | 19.38 | 0.0000     | 0.0001           | 3 | 262.68     | p(FEDBEFORE)    | 2.540    | 0.513 | 0.551       | 1.460       | 3.620       |
| psi(.),p(GARDENSIZE)                   | 234.66 | 20.24 | 0.0000     | 0.0000           | 3 | 263.67     | p(GARDENSIZE)   | -1.829   | 0.565 | 0.606       | -3.017      | -0.640      |
| psi(.),p(FEEDOTHERS)                   | 239.51 | 25.09 | 0.0000     | 0.0000           | 3 | 269.26     | p(FEEDOTHERS)   | 2.326    | 0.826 | 0.887       | 0.587       | 4.065       |
| psi(NEAREST+VE),p(.)                   | 240.59 | 26.17 | 0.0000     | 0.0000           | 3 | 270.51     | psi(NEAREST+VE) | -1.113   | 0.522 | 0.560       | -2.211      | -0.016      |
| psi(GARDENSIZE),p(.)                   | 241.65 | 27.23 | 0.0000     | 0.0000           | 3 | 271.73     | psi(GARDENSIZE) | -1.245   | 0.653 | 0.701       | -2.618      | 0.129       |
| psi(.),p(NEAREST+VE)                   | 242.03 | 27.61 | 0.0000     | 0.0000           | 3 | 272.17     | p(NEAREST+VE)   | -0.997   | 0.396 | 0.425       | -1.830      | -0.163      |
| psi(.),p(GRASSTEMP)                    | 242.56 | 28.14 | 0.0000     | 0.0000           | 3 | 272.78     | p(GRASSTEMP)    | 0.430    | 0.198 | 0.213       | 0.013       | 0.848       |
| psi(.),p(AIRTEMP)                      | 242.66 | 28.24 | 0.0000     | 0.0000           | 3 | 272.89     | p(AIRTEMP)      | 0.434    | 0.204 | 0.219       | 0.004       | 0.863       |
| psi(FEEDOTHERS),p(.)                   | 244.44 | 30.02 | 0.0000     | 0.0000           | 3 | 274.95     | psi(FEEDOTHERS) | 1.299    | 0.829 | 0.890       | -0.446      | 3.043       |
| psi(.),p(CONNECTIVITY)                 | 244.88 | 30.46 | 0.0000     | 0.0000           | 3 | 275.45     | p(CONNECTIVITY) | 1.118    | 0.747 | 0.802       | -0.455      | 2.690       |
| psi(.),p(GOODHABITAT)                  | 244.97 | 30.55 | 0.0000     | 0.0000           | 3 | 275.56     | p(GOODHABITAT)  | -1.635   | 1.043 | 1.120       | -3.830      | 0.560       |
| 1 group, Constant P                    | 245.01 | 30.59 | 0.0000     | 0.0000           | 2 | 277.91     |                 |          |       |             |             |             |
| psi(.),p(ARABLE500m)                   | 245.27 | 30.85 | 0.0000     | 0.0000           | 3 | 275.90     | p(ARABLE500m)   | 0.198    | 0.137 | 0.147       | -0.091      | 0.486       |
| psi(.),p(FRONT2BACK)                   | 245.45 | 31.03 | 0.0000     | 0.0000           | 3 | 276.11     | p(FRONT2BACK)   | -0.531   | 0.403 | 0.433       | -1.379      | 0.318       |
| psi(GRASS250m),p(.)                    | 245.52 | 31.10 | 0.0000     | 0.0000           | 3 | 276.19     | psi(GRASS250m)  | -0.445   | 0.381 | 0.409       | -1.246      | 0.356       |
| psi(WOOD500m),p(.)                     | 245.57 | 31.15 | 0.0000     | 0.0000           | 3 | 276.25     | psi(WOOD500m)   | 0.367    | 0.290 | 0.311       | -0.242      | 0.977       |
| psi(HOUSETYPE),p(.)                    | 245.80 | 31.38 | 0.0000     | 0.0000           | 3 | 276.51     | psi(HOUSETYPE)  | 0.937    | 0.843 | 0.905       | -0.837      | 2.712       |

|                        |        |       |        |        |   |        |                   |        |       |       |        |       |
|------------------------|--------|-------|--------|--------|---|--------|-------------------|--------|-------|-------|--------|-------|
| psi(.),p(WOODDIST)     | 245.94 | 31.52 | 0.0000 | 0.0000 | 3 | 276.67 | p(WOODDIST)       | -0.335 | 0.313 | 0.336 | -0.993 | 0.322 |
| psi(WOODDIST),p(.)     | 245.94 | 31.52 | 0.0000 | 0.0000 | 3 | 276.67 | psi(WOODDIST)     | -0.287 | 0.251 | 0.269 | -0.814 | 0.241 |
| psi(ARABLE500m),p(.)   | 246.03 | 31.61 | 0.0000 | 0.0000 | 3 | 276.78 | psi(ARABLE500m)   | 0.289  | 0.275 | 0.295 | -0.289 | 0.867 |
| psi(NESTSITES),p(.)    | 246.09 | 31.67 | 0.0000 | 0.0000 | 3 | 276.85 | psi(NESTSITES)    | 0.293  | 0.288 | 0.310 | -0.314 | 0.900 |
| psi(CONNECTIVITY),p(.) | 246.14 | 31.72 | 0.0000 | 0.0000 | 3 | 276.91 | psi(CONNECTIVITY) | 1.025  | 1.044 | 1.121 | -1.172 | 3.222 |
| psi(.),p(HOUSETYPE)    | 246.16 | 31.74 | 0.0000 | 0.0000 | 3 | 276.93 | p(HOUSETYPE)      | -0.588 | 0.564 | 0.605 | -1.775 | 0.598 |
| psi(NEARESTOTHER),p(.) | 246.23 | 31.81 | 0.0000 | 0.0000 | 3 | 277.01 | psi(NEARESTOTHER) | 0.260  | 0.277 | 0.298 | -0.323 | 0.844 |
| psi(URBAN250m),p(.)    | 246.30 | 31.88 | 0.0000 | 0.0000 | 3 | 277.09 | psi(URBAN250m)    | 0.273  | 0.314 | 0.337 | -0.387 | 0.934 |
| psi(GRASS500m),p(.)    | 246.47 | 32.05 | 0.0000 | 0.0000 | 3 | 277.29 | psi(GRASS500m)    | -0.239 | 0.317 | 0.341 | -0.907 | 0.429 |
| psi(.),p(URBAN250m)    | 246.55 | 32.13 | 0.0000 | 0.0000 | 3 | 277.38 | p(URBAN250m)      | 0.181  | 0.255 | 0.274 | -0.355 | 0.717 |
| psi(.),p(DAYTIME)      | 246.66 | 32.24 | 0.0000 | 0.0000 | 3 | 277.50 | p(DAYTIME)        | 0.114  | 0.178 | 0.191 | -0.261 | 0.488 |
| psi(ARABLEDIST),p(.)   | 246.68 | 32.26 | 0.0000 | 0.0000 | 3 | 277.53 | psi(ARABLEDIST)   | -0.179 | 0.294 | 0.316 | -0.798 | 0.441 |
| psi(FRONT2BACK),p(.)   | 246.72 | 32.30 | 0.0000 | 0.0000 | 3 | 277.57 | psi(FRONT2BACK)   | -0.328 | 0.571 | 0.613 | -1.529 | 0.873 |
| psi(.),p(NEARESTOTHER) | 246.73 | 32.31 | 0.0000 | 0.0000 | 3 | 277.59 | p(NEARESTOTHER)   | -0.086 | 0.154 | 0.166 | -0.411 | 0.239 |
| psi(.),p(RAINFALL)     | 246.75 | 32.33 | 0.0000 | 0.0000 | 3 | 277.61 | p(RAINFALL)       | 0.096  | 0.176 | 0.188 | -0.274 | 0.465 |
| psi(.),p(WOOD500m)     | 246.78 | 32.36 | 0.0000 | 0.0000 | 3 | 277.64 | p(WOOD500m)       | -0.097 | 0.188 | 0.201 | -0.491 | 0.298 |
| psi(GOODHABITAT),p(.)  | 246.83 | 32.41 | 0.0000 | 0.0000 | 3 | 277.70 | psi(GOODHABITAT)  | 0.744  | 1.680 | 1.804 | -2.791 | 4.280 |
| psi(GRASSDIST),p(.)    | 246.84 | 32.42 | 0.0000 | 0.0000 | 3 | 277.71 | psi(GRASSDIST)    | 0.127  | 0.283 | 0.304 | -0.470 | 0.723 |
| psi(.),p(GRASSDIST)    | 246.88 | 32.46 | 0.0000 | 0.0000 | 3 | 277.76 | p(GRASSDIST)      | 0.068  | 0.177 | 0.190 | -0.306 | 0.441 |
| psi(.),p(URBAN500m)    | 246.90 | 32.48 | 0.0000 | 0.0000 | 3 | 277.78 | p(URBAN500m)      | -0.078 | 0.214 | 0.230 | -0.528 | 0.372 |
| psi(.),p(GRASS500m)    | 246.91 | 32.49 | 0.0000 | 0.0000 | 3 | 277.79 | p(GRASS500m)      | -0.107 | 0.317 | 0.341 | -0.775 | 0.561 |
| psi(.),p(WOOD250m)     | 246.92 | 32.50 | 0.0000 | 0.0000 | 3 | 277.81 | p(WOOD250m)       | -0.080 | 0.254 | 0.273 | -0.615 | 0.454 |
| psi(.),p(ARABLEDIST)   | 246.96 | 32.54 | 0.0000 | 0.0000 | 3 | 277.85 | p(ARABLEDIST)     | -0.043 | 0.187 | 0.201 | -0.437 | 0.350 |
| psi(WOOD250m),p(.)     | 246.99 | 32.57 | 0.0000 | 0.0000 | 3 | 277.89 | psi(WOOD250m)     | -0.042 | 0.292 | 0.313 | -0.656 | 0.572 |
| psi(URBAN500m),p(.)    | 247.00 | 32.58 | 0.0000 | 0.0000 | 3 | 277.90 | psi(URBAN500m)    | 0.016  | 0.287 | 0.309 | -0.589 | 0.621 |
| psi(.),p(NESTSITES)    | 247.00 | 32.58 | 0.0000 | 0.0000 | 3 | 277.90 | p(NESTSITES)      | -0.015 | 0.182 | 0.195 | -0.397 | 0.367 |
| psi(.),p(GRASS250m)    | 247.01 | 32.59 | 0.0000 | 0.0000 | 3 | 277.91 | p(GRASS250m)      | 0.020  | 0.598 | 0.642 | -1.239 | 1.278 |

**Table S4.** Full occupancy model results for spring (Weeks 17-20: 10/03/2018-06/04/2018). Detection probability was modelled as constant.

| Model                               | QAIC  | ΔQAIC | AIC weight | Model likelihood | K | -2*LogLike | Covariates        | Estimate | SE    | Inflated SE | Lower limit | Upper limit |
|-------------------------------------|-------|-------|------------|------------------|---|------------|-------------------|----------|-------|-------------|-------------|-------------|
| psi(FEEDHOG),p(DAYTIME + FEEDOTHER) | 71.83 | 0.00  | 0.2413     | 1.0000           | 5 | 173.97     | psi(FEEDHOG)      | 1.555    | 0.422 | 0.708       | 0.168       | 2.943       |
|                                     |       |       |            |                  |   |            | p(DAYTIME)        | 0.758    | 0.278 | 0.467       | -0.158      | 1.674       |
|                                     |       |       |            |                  |   |            | p(FEEDOTHER)      | 1.356    | 0.550 | 0.923       | -0.453      | 3.166       |
| psi(FEDBEFORE),p(.)                 | 71.97 | 0.14  | 0.2250     | 0.9324           | 3 | 185.63     | psi(FEDBEFORE)    | 2.657    | 0.644 | 1.081       | 0.538       | 4.776       |
| psi(FEEDHOG),p(.)                   | 72.82 | 0.99  | 0.1471     | 0.6096           | 3 | 188.02     | psi(FEEDHOG)      | 1.546    | 0.418 | 0.701       | 0.172       | 2.921       |
| psi(NEAREST+VE),p(.)                | 76.13 | 4.30  | 0.0281     | 0.1165           | 3 | 197.32     | psi(NEAREST+VE)   | -1.183   | 0.503 | 0.844       | -2.837      | 0.470       |
| psi(.),p(FRONT2BACK)                | 76.35 | 4.52  | 0.0252     | 0.1044           | 3 | 197.94     | p(FRONT2BACK)     | -1.365   | 0.481 | 0.806       | -2.945      | 0.216       |
| psi(.),p(NEAREST+VE)                | 76.41 | 4.58  | 0.0244     | 0.1013           | 3 | 198.13     | p(NEAREST+VE)     | -1.410   | 0.468 | 0.786       | -2.949      | 0.130       |
| psi(.),p(DAYTIME)                   | 76.67 | 4.84  | 0.0215     | 0.0889           | 3 | 198.85     | p(DAYTIME)        | 0.710    | 0.267 | 0.449       | -0.169      | 1.590       |
| psi(.),p(FEEDOTHER)                 | 77.28 | 5.45  | 0.0158     | 0.0655           | 3 | 200.58     | p(FEEDOTHER)      | 1.277    | 0.532 | 0.892       | -0.471      | 3.026       |
| 1 group, Constant P                 | 77.41 | 5.58  | 0.0148     | 0.0614           | 2 | 206.57     |                   |          |       |             |             |             |
| psi(WOOD500m),p(.)                  | 77.53 | 5.70  | 0.0140     | 0.0578           | 3 | 201.27     | psi(WOOD500m)     | 0.626    | 0.285 | 0.478       | -0.311      | 1.563       |
| psi(.),p(AIRTEMP)                   | 78.29 | 6.46  | 0.0095     | 0.0396           | 3 | 203.42     | p(AIRTEMP)        | 0.252    | 0.143 | 0.239       | -0.217      | 0.721       |
| psi(.),p(GRASSTEMP)                 | 78.46 | 6.63  | 0.0088     | 0.0363           | 3 | 203.90     | p(GRASSTEMP)      | 0.257    | 0.159 | 0.267       | -0.266      | 0.779       |
| psi(ARABLEDIST),p(.)                | 78.47 | 6.64  | 0.0087     | 0.0362           | 3 | 203.93     | psi(ARABLEDIST)   | -0.454   | 0.293 | 0.492       | -1.418      | 0.509       |
| psi(.),p(FEEDHOG)                   | 78.52 | 6.69  | 0.0085     | 0.0353           | 3 | 204.06     | p(FEEDHOG)        | 1.084    | 0.427 | 0.716       | -0.319      | 2.487       |
| psi(WOODDIST),p(.)                  | 78.58 | 6.75  | 0.0083     | 0.0342           | 3 | 204.22     | psi(WOODDIST)     | -0.432   | 0.296 | 0.496       | -1.405      | 0.541       |
| psi(GRASS250m),p(.)                 | 78.75 | 6.92  | 0.0076     | 0.0314           | 3 | 204.70     | psi(GRASS250m)    | -0.410   | 0.329 | 0.552       | -1.492      | 0.671       |
| psi(ARABLE500m),p(.)                | 78.80 | 6.97  | 0.0074     | 0.0307           | 3 | 204.85     | psi(ARABLE500m)   | 0.344    | 0.271 | 0.455       | -0.547      | 1.236       |
| psi(URBAN250m),p(.)                 | 78.85 | 7.02  | 0.0072     | 0.0299           | 3 | 204.98     | psi(URBAN250m)    | 0.355    | 0.295 | 0.495       | -0.614      | 1.324       |
| psi(.),p(GRASS250m)                 | 79.00 | 7.17  | 0.0067     | 0.0277           | 3 | 205.42     | p(GRASS250m)      | 0.526    | 0.492 | 0.826       | -1.093      | 2.144       |
| psi(GARDENSIZE),p(.)                | 79.07 | 7.24  | 0.0065     | 0.0268           | 3 | 205.60     | psi(GARDENSIZE)   | 0.001    | 0.004 | 0.007       | -0.014      | 0.015       |
| psi(.),(GARDENSIZE)                 | 79.07 | 7.24  | 0.0065     | 0.0268           | 3 | 205.61     | p(GARDENSIZE)     | 0.001    | 0.013 | 0.021       | -0.041      | 0.043       |
| psi(.),p(GRASS500m)                 | 79.08 | 7.25  | 0.0064     | 0.0266           | 3 | 205.62     | p(GRASS500m)      | 0.282    | 0.292 | 0.489       | -0.677      | 1.241       |
| psi(CONNECTIVITY),p(.)              | 79.11 | 7.28  | 0.0063     | 0.0263           | 3 | 205.72     | psi(CONNECTIVITY) | 0.869    | 0.953 | 1.599       | -2.266      | 4.004       |
| psi(.),p(GRASSDIST)                 | 79.11 | 7.28  | 0.0063     | 0.0263           | 3 | 205.73     | p(GRASSDIST)      | -0.186   | 0.204 | 0.341       | -0.855      | 0.483       |
| psi(.),p(URBAN500m)                 | 79.17 | 7.34  | 0.0061     | 0.0255           | 3 | 205.89     | p(URBAN500m)      | -0.204   | 0.250 | 0.419       | -1.024      | 0.617       |
| psi(NESTSITES),p(.)                 | 79.17 | 7.34  | 0.0061     | 0.0255           | 3 | 205.89     | psi(NESTSITES)    | 0.217    | 0.266 | 0.446       | -0.658      | 1.092       |
| psi(GRASSDIST),p(.)                 | 79.18 | 7.35  | 0.0061     | 0.0253           | 3 | 205.91     | psi(GRASSDIST)    | 0.213    | 0.265 | 0.445       | -0.659      | 1.085       |

|                        |       |      |        |        |   |        |                   |        |       |       |        |       |
|------------------------|-------|------|--------|--------|---|--------|-------------------|--------|-------|-------|--------|-------|
| psi(.),p(RAINFALL)     | 79.19 | 7.36 | 0.0061 | 0.0252 | 3 | 205.93 | p(RAINFALL)       | 0.198  | 0.251 | 0.421 | -0.626 | 1.023 |
| psi(.),p(FEDBEFORE)    | 79.19 | 7.36 | 0.0061 | 0.0252 | 3 | 205.94 | p(FEDBEFORE)      | 0.497  | 0.673 | 1.130 | -1.717 | 2.711 |
| psi(URBAN500m),p(.)    | 79.22 | 7.39 | 0.0060 | 0.0248 | 3 | 206.04 | psi(URBAN500m)    | -0.190 | 0.263 | 0.442 | -1.056 | 0.675 |
| psi(.),p(ARABLE500m)   | 79.23 | 7.40 | 0.0060 | 0.0247 | 3 | 206.05 | p(ARABLE500m)     | 0.139  | 0.198 | 0.333 | -0.513 | 0.792 |
| psi(.),p(WOOD250m)     | 79.26 | 7.43 | 0.0059 | 0.0244 | 3 | 206.13 | p(WOOD250m)       | -0.234 | 0.363 | 0.609 | -1.429 | 0.960 |
| psi(GOODHABITAT),p(.)  | 79.26 | 7.43 | 0.0059 | 0.0244 | 3 | 206.15 | psi(GOODHABITAT)  | -0.950 | 1.468 | 2.463 | -5.777 | 3.876 |
| psi(.),p(ARABLEDIST)   | 79.27 | 7.44 | 0.0058 | 0.0242 | 3 | 206.17 | p(ARABLEDIST)     | -0.147 | 0.236 | 0.396 | -0.923 | 0.629 |
| psi(.),p(HOUSETYPE)    | 79.28 | 7.45 | 0.0058 | 0.0241 | 3 | 206.20 | p(HOUSETYPE)      | 0.329  | 0.546 | 0.916 | -1.466 | 2.124 |
| psi(WOOD250m),p(.)     | 79.30 | 7.47 | 0.0058 | 0.0239 | 3 | 206.26 | psi(WOOD250m)     | -0.152 | 0.281 | 0.471 | -1.076 | 0.772 |
| psi(.),p(CONNECTIVITY) | 79.33 | 7.50 | 0.0057 | 0.0235 | 3 | 206.33 | p(CONNECTIVITY)   | 0.406  | 0.835 | 1.400 | -2.338 | 3.150 |
| psi(.),p(WOOD500m)     | 79.36 | 7.53 | 0.0056 | 0.0232 | 3 | 206.41 | p(WOOD500m)       | -0.086 | 0.219 | 0.368 | -0.806 | 0.635 |
| psi(.),p(URBAN250m)    | 79.37 | 7.54 | 0.0056 | 0.0231 | 3 | 206.45 | p(URBAN250m)      | 0.106  | 0.324 | 0.543 | -0.958 | 1.171 |
| psi(FRONT2BACK),p(.)   | 79.38 | 7.55 | 0.0055 | 0.0229 | 3 | 206.48 | psi(FRONT2BACK)   | 0.156  | 0.525 | 0.880 | -1.569 | 1.881 |
| psi(HOUSETYPE),p(.)    | 79.38 | 7.55 | 0.0055 | 0.0229 | 3 | 206.48 | psi(HOUSETYPE)    | -0.187 | 0.660 | 1.108 | -2.358 | 1.985 |
| psi(.),p(WOODDIST)     | 79.38 | 7.55 | 0.0055 | 0.0229 | 3 | 206.49 | p(WOODDIST)       | 0.101  | 0.342 | 0.573 | -1.023 | 1.225 |
| psi(.),p(GOODHABITAT)  | 79.39 | 7.56 | 0.0055 | 0.0228 | 3 | 206.51 | p(GOODHABITAT)    | 0.229  | 0.973 | 1.633 | -2.971 | 3.429 |
| psi(.),p(NEARESTOTHER) | 79.39 | 7.56 | 0.0055 | 0.0228 | 3 | 206.50 | p(NEARESTOTHER)   | 0.048  | 0.189 | 0.318 | -0.575 | 0.670 |
| psi(GRASS500m),p(.)    | 79.40 | 7.57 | 0.0055 | 0.0227 | 3 | 206.54 | psi(GRASS500m)    | -0.039 | 0.267 | 0.448 | -0.916 | 0.839 |
| psi(.),p(NESTSITES)    | 79.40 | 7.57 | 0.0055 | 0.0227 | 3 | 206.54 | p(NESTSITES)      | -0.042 | 0.229 | 0.384 | -0.795 | 0.710 |
| psi(FEEDOTHER),p(.)    | 79.40 | 7.57 | 0.0055 | 0.0227 | 3 | 206.53 | psi(FEEDOTHER)    | -0.106 | 0.612 | 1.026 | -2.118 | 1.905 |
| psi(NEARESTOTHER),p(.) | 79.41 | 7.58 | 0.0055 | 0.0226 | 3 | 206.56 | psi(NEARESTOTHER) | -0.018 | 0.264 | 0.443 | -0.887 | 0.851 |
